# Supplementary material
Source: PubMed Central journal article supplement (PMC7617057)

## Supplementary Information

### **DEAD-box ATPases are global regulators of phase-separated organelles**

#### **Authors:**

Maria Hondele<sup>1</sup>, Ruchika Sachdev<sup>1</sup>, Stephanie Heinrich<sup>1</sup>, Juan Wang<sup>2</sup>, Pascal Vallotton<sup>1</sup>,  
Beatriz M.A. Fontoura<sup>2</sup>, Karsten Weis<sup>1</sup>

#### **Affiliations:**

<sup>1</sup> Institute of Biochemistry, ETH Zurich, 8093 Zurich, Switzerland.

<sup>2</sup> Department of Cell Biology, University of Texas Southwestern Medical Center, Dallas, TX  
75390, USA.

#### **Correspondence:**

[karsten.weis@bc.biol.ethz.ch](mailto:karsten.weis@bc.biol.ethz.ch)

**Supplementary Table 1: Yeast strains used in this study**

|          |                                                                                                                                                                                                                            |
|----------|----------------------------------------------------------------------------------------------------------------------------------------------------------------------------------------------------------------------------|
| KWY 1973 | <i>MAT a ade2-1 can1-100 GAL phi+ his3-11,15 ura3-1 leu2-3, 112 trp1-1 dhh1::DHH1-HisMX6 GFP dcp2::DCP2-mCherry-NatMX6</i>                                                                                                 |
| KWY7681  | <i>MAT a ade2-1 can1-100 GAL phi+ his3-11,15 ura3-1 leu2-3, 112 trp1-1 dhh1::DHH1 Δ NΔ C HisMX6 yEGFP dcp2::DCP2-mCherry-NatMX6</i>                                                                                        |
| KWY7906  | <i>Nup60-3xmKate2::CaURA3 HIS::pGPD1-LexA-B112(pNH604) Chromosome2(CHS3-SCO2 intergenic region)::p(LexA(4)-pCYC1min)_3xGST-V5_24xPP7sl_Tcyc1_NatNT2 LEU2::pMET25-PP7CP-yEGFP Sub2-V5-IAA7::KAN</i>                         |
| KWY7910  | <i>Nup60-3xmKate2::CaURA3 HIS::pGPD1-LexA-B112(pNH604) Chromosome2(CHS3-SCO2 intergenic region)::p(LexA(4)-pCYC1min)_3xGST-V5_24xPP7sl_Tcyc1_NatNT2 LEU2::pMET25-PP7CP-yEGFP Sub2-V5-IAA7::KAN</i>                         |
| KWY7913  | <i>Nup60-3xmKate2::CaURA3 HIS::pGPD1-LexA-B112(pNH604) Chromosome2(CHS3-SCO2 intergenic region)::p(LexA(4)-pCYC1min)_3xGST-V5_24xPP7sl_Tcyc1_NatNT2 LEU2::pMET25-PP7CP-yEGFP Sub2-V5-IAA7::KAN TRP1::pGPD-osTIR-hphNT1</i> |
| KWY7914  | <i>Nup60-3xmKate2::CaURA3 HIS::pGPD1-LexA-B112(pNH604) Chromosome2(CHS3-SCO2 intergenic region)::p(LexA(4)-pCYC1min)_3xGST-V5_24xPP7sl_Tcyc1_NatNT2 LEU2::pMET25-PP7CP-yEGFP Sub2-V5-IAA7::KAN TRP1::pGPD-osTIR-hphNT1</i> |
| KWY8254  | <i>his3_1 leu2_0 met15_0 ura3_0 FBA1::24 X PP7 loops DED1-yEGFP-Y66L-IAA7-KAN TRP1::YIPlac-Gal4BD-ER_BD-VP16-hphNT1 ChrII-HR1_pGal1_Ded1-mCherry_cyc1T_NATNT2_ChrII-HR2</i>                                                |
| KWY8255  | <i>his3_1 leu2_0 met15_0 ura3_0 FBA1::24 X PP7 loops DED1-yEGFP-Y66L-IAA7-KAN pNH603-pGPD1-osTIR::HIS TRP1::YIPlac-Gal4BD-ER_BD-VP16-hphNT1 ChrII-HR1_pGal1_Ded1-mCherry_cyc1T_NATNT2_ChrII-HR2</i>                        |
| KWY8256  | <i>his3_1 leu2_0 met15_0 ura3_0 FBA1::24 X PP7 loops DED1-yEGFP-Y66L-IAA7-KAN TRP1::YIPlac-Gal4BD-ER_BD-VP16-hphNT1 ChrII-HR1_pGal1_Ded1-DQAD-mCherry_cyc1T_NATNT2_ChrII-HR2</i>                                           |
| KWY8257  | <i>his3_1 leu2_0 met15_0 ura3_0 FBA1::24 X PP7 loops DED1-yEGFP-Y66L-IAA7-KAN pNH603-pGPD1-osTIR::HIS TRP1::YIPlac-Gal4BD-ER_BD-VP16-hphNT1 ChrII-HR1_pGal1_Ded1-DQAD-mCherry_cyc1T_NATNT2_ChrII-HR2</i>                   |
| KWY8275  | <i>MAT a ade2-1 can1-100 GAL phi+ his3-11,15 ura3-1 leu2-3, 112 trp1-1 ded1::DED1-yEGFP-HisMX6</i>                                                                                                                         |
| KWY8278  | <i>MAT a ade2-1 can1-100 GAL phi+ his3-11,15 ura3-1 leu2-3, 112 trp1-1 dhh1::dqad ded1::DED1-yEGFP-HisMX6</i>                                                                                                              |
| KWY8281  | <i>MAT a ade2-1 can1-100 GAL phi+ his3-11,15 ura3-1 leu2-3, 112 trp1-1 dhh1Δ::KanMX6 ded1::DED1-yEGFP-HisMX6</i>                                                                                                           |
| KWY8283  | <i>MAT a ade2-1 can1-100 GAL phi+ his3-11,15 ura3-1 leu2-3, 112 trp1-1 pab1::PAB1-yEGFP-HisMX6</i>                                                                                                                         |
| KWY8286  | <i>MAT a ade2-1 can1-100 GAL phi+ his3-11,15 ura3-1 leu2-3, 112 trp1-1 dhh1::dqad pab1::PAB1-yEGFP-HisMX6</i>                                                                                                              |
| KWY8289  | <i>MAT a ade2-1 can1-100 GAL phi+ his3-11,15 ura3-1 leu2-3, 112 trp1-1 dhh1Δ::KanMX6 pab1::PAB1-yEGFP-HisMX6</i>                                                                                                           |

**Supplementary Table 2: Plasmids used in this study**

|         |                                                     |                                             |
|---------|-----------------------------------------------------|---------------------------------------------|
| pKW891  | in vitro transcription, CY5-labeled 1329nt RNA      | pAS575                                      |
| pKW967  | bacterial expression, GFP                           | pET-GFP                                     |
| pKW2613 | bacterial expression, eIF4G                         | pSV272-eIF4G(572-952)                       |
| pKW2922 | bacterial expression, GFP                           | pET_2xGFP-6xHis                             |
| pKW3469 | bacterial expression, Not1-MIF4G                    | pETMCN_His-TEV_V5-Not1-MIF4G (754-1000)     |
| pkw3570 | plasmid for endogenous tagging                      | pFA6a-yEGFP-HIS3MX                          |
| pKW3631 | bacterial expression, Dhh1 FL                       | pETMCN_His-TEV_V5-Dhh1-mCherry              |
| pKW3640 | bacterial expression, Dhh1-GFP                      | pETMCN_His-TEV_V5-Dhh1-GFP(A206K)           |
| pKW3714 | bacterial expression, Dbp5-mCherry                  | pETMCN_His-TEV_V5-Dbp5-mCherry              |
| pKW4063 | bacterial expression, Dhh1 core                     | pETMCN_His-TEV_V5-Dhh1[48-425]-mCh          |
| pKW4080 | bacterial expression, Sub2-mCherry                  | pETMCN_His-TEV_V5-Sub2-mCherry              |
| pKW4084 | bacterial expression, Ded1-mCherry                  | pETMCN_His-TEV_V5-Ded1-mCherry              |
| pKW4085 | bacterial expression, eIF4A-mCherry                 | pETMCN_His-TEV_V5-eIF4A-mCherry             |
| pKW4289 | bacterial expression, Dbp1-mCherry                  | pETMCN_His-TEV_V5-Dbp1-mCherry              |
| pKW4293 | bacterial expression, Dbp2-mCherry                  | pETMCN_His-TEV_V5-Dbp2-mCherry              |
| pKW4360 | bacterial expression, DbpA_mCherry                  | pETMCN_His-TEV_V5-DbpA_mCherry              |
| pKW4361 | bacterial expression, RhlB-mCherry                  | pETMCN_His-TEV_V5-RhlB-mCherry              |
| pKW4379 | bacterial expression, DeaD-mCherry                  | pETMCN_His-TEV_V5-DeaD-mCherry              |
| pKW4380 | bacterial expression, SrmB-mCherry                  | pETMCN_His-TEV_V5-SrmB-mCherry              |
| pKW4382 | bacterial expression, RhlE-mCherry                  | pETMCN_His-TEV_V5-RhlE-mCherry              |
| pKW4383 | bacterial expression, Ded1 <sup>DQAD</sup> -mCherry | pETMCN_His-TEV_V5-Ded1 <sup>DQAD</sup> -mCh |
| pKW4406 | bacterial expression, Ded1-GFP                      | pETMCN_His-TEV_V5-Ded1-yEGFP(A206K)         |
| pkw4519 | bacterial expression, DDX6-mCherry                  | pETMCN_HisMBP_V5-DDX6-mCherry               |
| pKW4557 | bacterial expression, DDX3X-mCherry                 | pETMCN_His-TEV_V5-DDX3X-mCherry             |

**Supplementary Table 3: Oligonucleotides used in this study**

|        |                       |                                                                                           |
|--------|-----------------------|-------------------------------------------------------------------------------------------|
| CH3566 | Fw, Ded1 GFP tagging  | AGCGATTCCAAGTCTTCTGGCTGGGGTAACAGCGGT<br>GGTCAAACAACACTCTTCTTGGTGG<br>CGGATCCCCGGGTTAATTA  |
| CH3567 | Rev, Ded1 GFP tagging | AGAAAATATAAGACATGCTAGAGCAGAAAACGAAGA<br>ATCCTCACCTAGTTTGTCTGAAA<br>GAATTCGAGCTCGTTTAAAC   |
| CH3568 | Fw, Pab1 GFP tagging  | GAAGCTTCTGCTGCCTATGAGTCTTTCAAAAAGGAGC<br>AAGAACAACAACACTGAGCAAGCT<br>CGGATCCCCGGGTTAATTA  |
| Ch3569 | Rev, Pab1 GFP tagging | AAGGGAGAAAAAAAAAAGATGATAAGTTTGTGAGTAG<br>GGAAGTAGGTGATTACATAGAGCA<br>GAATTCGAGCTCGTTTAAAC |

**Supplementary Table 4: setup conditions for *in vitro* droplet assays**

|                       | <b>storage buffer</b> | <b>droplet setup conditions</b>                                                                                                                                                                     | <b>final concentration</b> |
|-----------------------|-----------------------|-----------------------------------------------------------------------------------------------------------------------------------------------------------------------------------------------------|----------------------------|
| Dhh1 FL pKW3631       | MH200G                | 5.25 $\mu$ l 50 $\mu$ M Dhh1-mCherry<br>15.75 $\mu$ l LSB-150<br>1 $\mu$ l CKM<br>1 $\mu$ l 10 mg/ml BSA<br>1 $\mu$ l Hepes pH 6.4<br>0.25 $\mu$ l 10 mg/ml polyU                                   | 10.5 $\mu$ M               |
| Dhh1 core pKW4063     | MH200G                | 5.25 $\mu$ l 50 $\mu$ M Dhh1-core-mCherry<br>15.75 $\mu$ l LSB-150<br>1 $\mu$ l CKM<br>1 $\mu$ l 10 mg/ml BSA<br>1 $\mu$ l Hepes pH 6.4<br>0.25 $\mu$ l 10 mg/ml polyU                              | 10.5 $\mu$ M               |
| Ded1-mCherry pKW4084  | MH20G                 | 2.5ul 50uM Ded1-mCherry in MH200G<br>13ul LSB-50<br>1ul CK mix<br>2ul Hepes pH 6.8<br>1ul 10mg/ml BSA<br>1.5ul polyU 1mg/ml                                                                         | 6.25 $\mu$ M               |
| Dbp1-mCherry pKW4289  | MH200G                | 3 $\mu$ l 50uM Dbp1-mCherry in MH200G<br>14 $\mu$ l LSB-50<br>1 $\mu$ l CKM<br>2 $\mu$ l Hepes pH 6.4<br>1 $\mu$ l 10mg/ml BSA<br>1 $\mu$ l 1mg/ml polyU                                            | 7.5 $\mu$ M                |
| Dbp2-mCherry pKW4293  | MH300G                | 2.5 $\mu$ l 50 $\mu$ M mCherry-Dbp2 in MH200G<br>11.5 $\mu$ l MH200G<br>1 $\mu$ l 1M phosphate pH 6.0<br>1 $\mu$ l CKM<br>2 $\mu$ l Hepes pH 6.0<br>1 $\mu$ l 10mg/ml BSA<br>1 $\mu$ l 1mg/ml polyU | 6.25 $\mu$ M               |
| eIF4A-mCherry pKW4085 | MH200G                | 2 $\mu$ l eIF4A-mCherry at 500 $\mu$ M<br>9 $\mu$ l LSB-150<br>2 $\mu$ l CKM<br>1 $\mu$ l BSA 10mg/ml<br>1 $\mu$ l Hepes pH 6.6<br>3 $\mu$ l 1x ATPase buffer<br>2 $\mu$ l 1 mg/ml polyU            | 50 $\mu$ M                 |
| Sub2-mCherry pKW4080  | MH200G                | 2 $\mu$ l Sub2-mCherry at 500 $\mu$ M<br>9 $\mu$ l LSB-150<br>2 $\mu$ l CKM<br>1 $\mu$ l BSA 10mg/ml<br>1 $\mu$ l Hepes pH 6.6<br>3 $\mu$ l 1x ATPase buffer<br>2 $\mu$ l 1mg/ml polyU              | 50 $\mu$ M                 |
| Dbp5-mCherry pKW3714  | MH200G                | 2 $\mu$ l Dbp5-mCherry at 500 $\mu$ M<br>9 $\mu$ l LSB-150<br>2 $\mu$ l CKM<br>1 $\mu$ l BSA 10mg/ml<br>1 $\mu$ l Hepes pH 6.6<br>3 $\mu$ l 1x ATPase buffer<br>2 $\mu$ l 1mg/ml polyU              | 50 $\mu$ M                 |
| DDX6-mCherry pKW4519  | MH200G                | 2.5 $\mu$ l DDX6-mCherry at 50 $\mu$ M<br>14.5 $\mu$ l LSB-50<br>2 $\mu$ l CKM<br>1 $\mu$ l BSA 10mg/ml<br>1 $\mu$ l Hepes pH 6.4<br>3 $\mu$ l 2 mg/ml polyU                                        | 6.4 $\mu$ M                |

|                          | <b>storage buffer</b> | <b>droplet setup conditions</b>                                                                                                                                  | <b>final concentration</b> |
|--------------------------|-----------------------|------------------------------------------------------------------------------------------------------------------------------------------------------------------|----------------------------|
| DDX3X-mCherry<br>pKW4557 | MH300G                | 3 $\mu$ l DDX3X-mCherry at 50 $\mu$ M<br>14 $\mu$ l LSB-50<br>2 $\mu$ l CKM<br>1 $\mu$ l BSA 10mg/ml<br>1 $\mu$ l Hepes pH 6.8<br>2 $\mu$ l 2 mg/ml polyU        | 7.5 $\mu$ M                |
| DbpA-mCherry<br>pKW4360  | MH200G                | 3 $\mu$ l DbpA-mCherry at 50 $\mu$ M<br>16 $\mu$ l LSB-100<br>2 $\mu$ l CKM<br>1 $\mu$ l BSA 10 mg/ml<br>1 $\mu$ l 1M Hepes pH 6.4<br>2 $\mu$ l 2 mg/ml polyU    | 6 $\mu$ M                  |
| RhlB-mCherry<br>pKW4361  | MH200G                | 3 $\mu$ l RhlB-mCherry at 50 $\mu$ M<br>16 $\mu$ l LSB-100<br>2 $\mu$ l CKM<br>1 $\mu$ l BSA 10 mg/ml<br>1 $\mu$ l 1M Hepes pH 6.4<br>2 $\mu$ l 2 mg/ml polyU    | 6 $\mu$ M                  |
| DeaD-mCherry<br>pKW4379  | MH200G                | 3 $\mu$ l DeaD-mCherry at 50 $\mu$ M<br>17.5 $\mu$ l LSB-100<br>1 $\mu$ l CKM<br>1 $\mu$ l BSA 10mg/ml<br>1 $\mu$ l Hepes pH 6.4<br>1.5 $\mu$ l 2 mg/ml polyU    | 6 $\mu$ M                  |
| SrmB-mCherry<br>pKW4380  | MH200G                | 3 $\mu$ l SrmB-mCherry at 50 $\mu$ M<br>18.5 $\mu$ l LSB-50<br>1 $\mu$ l CKM<br>1 $\mu$ l BSA 10mg/ml<br>1.5 $\mu$ l 2 mg/ml polyU                               | 6 $\mu$ M                  |
| RhlE-mCherry<br>pKW4382  | MH200G                | 2 $\mu$ l RhlE-mCherry at 50 $\mu$ M<br>18.5 $\mu$ l LSB-100<br>1 $\mu$ l CKM<br>1 $\mu$ l BSA 10mg/ml<br>1 $\mu$ l Hepes 1M pH 6.8<br>1.5 $\mu$ l 2 mg/ml polyU | 4 $\mu$ M                  |

**Supplementary Table 5: setup conditions for *in vitro* Dhh1 phase diagram reactions**

|                | <b>droplet setup conditions</b>                                                                                                                                                                                                                                                                                                                                                                                                               |
|----------------|-----------------------------------------------------------------------------------------------------------------------------------------------------------------------------------------------------------------------------------------------------------------------------------------------------------------------------------------------------------------------------------------------------------------------------------------------|
| pH titration   | 13.4 $\mu$ l LSB-100<br>2.1 $\mu$ l 0.5M KCl (final KCl concentration 100mM)<br>1 $\mu$ l CKM mix<br>1.25 $\mu$ l 100mM ATP/MgCl <sub>2</sub> (final concentration 5mM)<br>1 $\mu$ l 10 mg/ml BSA, 2 $\mu$ l 1M Hepes of the respective pH<br>1.25 $\mu$ l 1mg/ml polyU (final concentration 0.05 mg/ml)<br>3 $\mu$ l mix of MH200G and Dhh1 stock to the final concentration as indicated                                                    |
| ATP titration  | 13.4 $\mu$ l LSB-100<br>2.1 $\mu$ l 0.5M KCl (final KCl concentration 100mM)<br>1 $\mu$ l CKM mix<br>1.5 $\mu$ l mix of ATP/MgCl <sub>2</sub> (250mM stock) and H <sub>2</sub> O to the final concentration as indicated<br>1 $\mu$ l 10 mg/ml BSA<br>2 $\mu$ l 1M Hepes of the respective pH<br>1.25 $\mu$ l 1mg/ml polyU (final concentration 0.05 mg/ml)<br>3 $\mu$ l mix of MH200G and Dhh1 stock to the final concentration as indicated |
| salt titration | 12.5 $\mu$ l LSB-100<br>3 $\mu$ l mix of 0.5M KCl / water to the final KCl concentration as indicated<br>1 $\mu$ l CKM mix<br>1.25 $\mu$ l 100mM ATP/MgCl <sub>2</sub> (final concentration 5 mM)<br>1 $\mu$ l 10 mg/ml BSA, 2 $\mu$ l 1M Hepes of the respective pH<br>1.25 $\mu$ l 1mg/ml polyU (final concentration 0.05 mg/ml)<br>3 $\mu$ l mix of MH200G and Dhh1 stock to the final concentration as indicated                          |
| pU titration   | 13.4 $\mu$ l LSB-100<br>2.1 $\mu$ l 0.5M KCl (final KCl concentration 100 mM)<br>1 $\mu$ l CKM mix<br>1.25 $\mu$ l 100mM ATP/MgCl <sub>2</sub> (final concentration 5 mM)<br>1 $\mu$ l 10 mg/ml BSA, 2 $\mu$ l 1M Hepes of the respective pH<br>1.25 $\mu$ l mix of water / 10mg/ml polyU to the final concentration as indicated<br>3 $\mu$ l mix of MH200G and Dhh1 stock to the final concentration as indicated                           |

# Supplementary Figure 1

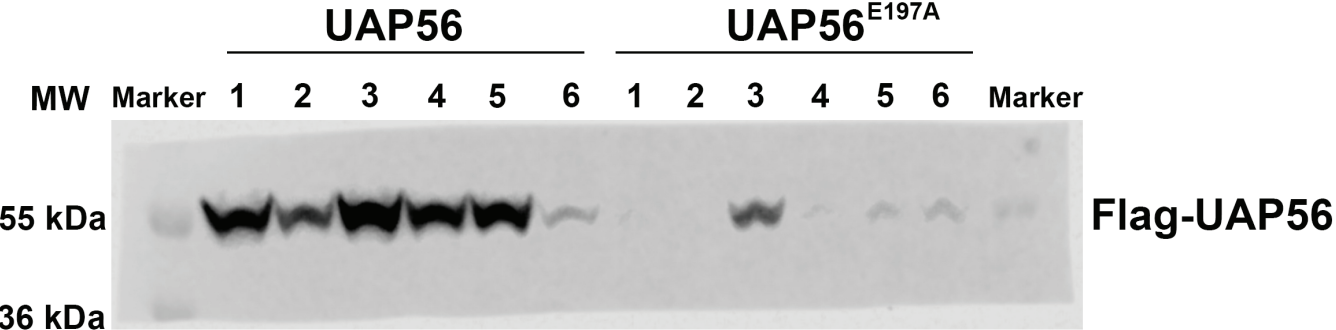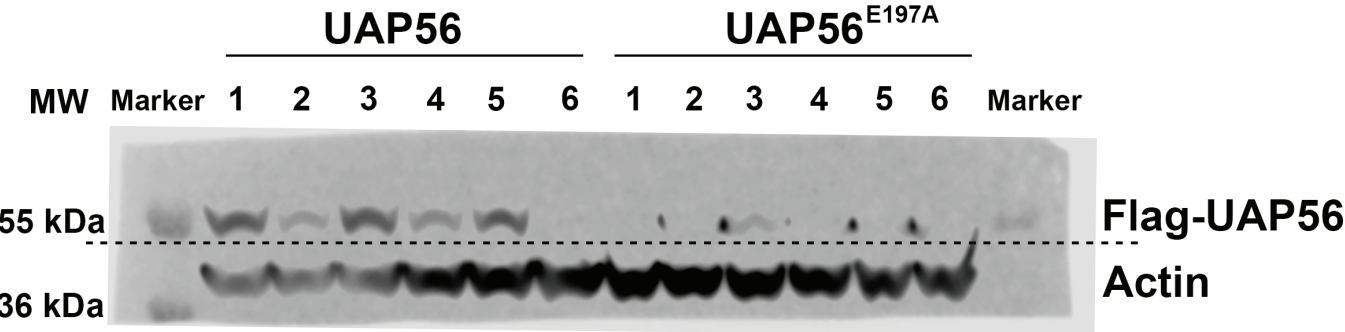

Supplement: EMS83777-supplement-Supplementary_Information_SI_2.pdf [file EMS83777-supplement-Supplementary_Information_SI_2.pdf]
